# Supplementary material for: Scaffolding depth cues and perceptual learning in VR to train stereovision: a proof of concept pilot study
Source: PubMed Central journal article supplement (PMC8114935; doi:10.1038/s41598-021-89064-z), 2021-05-12
Supplement: 41598_2021_89064_MOESM1_ESM.pdf [file 41598_2021_89064_MOESM1_ESM.pdf]

# **Scaffolding depth cues and perceptual learning in VR to train stereovision: A proof of concept pilot study.**

**Angelica Godinez<sup>1,\*</sup>, Santiago Martín-González<sup>2</sup>, Oliver Ibarrodo<sup>3</sup>, Dennis M Levi<sup>1</sup>**

<sup>1</sup>School of Optometry, University of California, Berkeley

<sup>2</sup>Construcción e Ingeniería de Fabricación, Universidad de Oviedo, Spain

<sup>3</sup>OSI Alto Deba, Unidad de Investigación AP, Arrasate, Spain

\*angelica\_godinez@berkeley.edu

## SUPPLEMENTARY MATERIAL

Table S1

*Participant clinical details.*

| SID          | Age, Gender | Dx     | Visual acuity                | Ocular alignment                       | Refractive error                                             | Fixation |
|--------------|-------------|--------|------------------------------|----------------------------------------|--------------------------------------------------------------|----------|
| <b>AA1</b>   | 24, M       | Aniso  | OD: 20/16<br>OS: 20/25 +1    | Far: ortho<br>Near: 4 EP               | OD: +1.25 -1.00 x002<br>OS: +4.25 -1.50 x170                 | Central  |
| <b>AA2</b>   | 18, F       | Aniso  | OD: 20/25 -1<br>OS: 20/20 +1 | Far: ortho<br>Near: ortho              | OD: +1.25 -1.25 x188<br>OS: +0.25 -0.25 x009                 | Central  |
| <b>AA3</b>   | 25, F       | Aniso  | OD: 20/20 +1<br>OS: 20/16    | Far: 4 EP<br>Near: 5 EP                | OD: +3.00<br>OS: plano<br>OD: +7.75 -2.25 x085<br>(add 2.25) | Central  |
| <b>AA4*</b>  | 62, M       | Aniso  | OD: 20/40 -2<br>OS: 20/20 -1 | Far: ortho<br>Near: ortho              | OS: +5.25 -1.50 x105<br>(add 2.25)                           | Central  |
| <b>AMS1*</b> | 21, M       | Strab  | OD: 20/25 -2<br>OS: 20/50 -2 | Far: ortho<br>Near: ortho              | OD: +5.50 -4.75 x008<br>OS: +5.75 -5.00 x172                 | Central  |
| <b>AS1</b>   | 36, F       | Strab  | OD: 20/20<br>OS: 20/20 -1    | Far: 4 RET<br>Near: 4 RET              | OD: -0.50 DS<br>OS: -0.25 DS                                 | Central  |
| <b>AS2</b>   | 30, F       | Strab  | OD: 20/20 -1<br>OS: 20/20 -1 | Far: 2 LET<br>Near: 4 LET              | OD: +3.25 -1.25 x170<br>OS: +3.50 -1.25 x010                 | Central  |
| <b>AS3</b>   | 20, M       | Strab  | OD: 20/20 -2<br>OS: 20/20 -1 | Far: trace XP<br>Near: 6 XP            | OD: +0.50 -0.50 x180<br>OS: plano -1.00 x180                 | Central  |
| <b>AS4</b>   | 54, M       | Strab  | OD: 20/25 -1<br>OS: 20/20 -1 | Far: 14 RET 5 HoT<br>Near: 6 LET 10HyT | OD: -1.00 -0.75 x160<br>OS: -1.00 -1.00 x020                 | Central  |
| <b>ASW1</b>  | 22, F       | Normal | OD: 20/20 +1<br>OS: 20/16 -2 | Far: trace XP<br>Near: 2 XP            | OD: -4.25 -1.00 x180<br>OS: -4.00 -0.75 x160                 | Central  |
| <b>N1</b>    | 25, F       | Normal | OD: 20/16 -1<br>OS: 20/16 -1 | Far: ortho<br>Near: ortho              | OD: -3.75 -0.75 x174<br>OS: -4.25 -0.50 x003                 | Central  |
| <b>N2</b>    | 26, F       | Normal | OD: 20/20<br>OS: 20/20       | Far: ortho<br>Near: ortho              | OD: -6.25 -0.25 x085<br>OS: -6.25 -0.25 x085                 | Central  |
| <b>N3</b>    | 28, M       | Normal | OD: 20/20 -2<br>OS: 20/20    | Far: ortho<br>Near: ortho              | OD: plano<br>OS: plano                                       | Central  |
| <b>N4</b>    | 24, F       | Normal | OD: 20/25 +1<br>OS: 20/25 +2 | Far: ortho<br>Near: 2XP                | OD: plano<br>OS: plano                                       | Central  |
| <b>N5</b>    | 28, F       | Normal | OD: 20/20 +2<br>OS: 20/20 +2 | Far: ortho<br>Near: ortho              | OD: -0.50 -2.25 x107<br>OS: -0.50 -2.25 x078                 | Central  |
| <b>N6</b>    | 23, F       | Normal | OD: 20/16 -2<br>OS: 20/16 -1 | Far: trace XP<br>Near: 3 XP            | OD: -3.25<br>OS: -3                                          | Central  |
| <b>N7</b>    | 23, F       | Normal | OD: 20/20 +2<br>OS: 20/20    | Far: trace XP<br>Near: 3 XP            | OD: +0.25 -1.50 x177<br>OS: +0.25 -1.25 x176                 | Central  |
| <b>N8</b>    | 24, F       | Normal | OD: 20/20 -1<br>OS: 20/20    | Far: 2 XP<br>Near: 6 XP                | OD: -5.25<br>OS: -7.5                                        | Central  |
| <b>N9</b>    | 23, F       | Normal | OD: 20/16 -1<br>OS: 20/16    | Far: ortho<br>Near: 4 EP               | OD: -1.00 DS<br>OS: -1.00 DS                                 | Central  |
| <b>N10</b>   | 24, F       | Normal | OD: 20/16<br>OS: 20/12.5     | Far: ortho<br>Near: ortho              | OD: -1.75 DS<br>OS: -1.75 DS                                 | Central  |

AA = Participants with anisometropia (n = 4); AMS = Micro-strabismic participant (n = 1); AS = Participants with strabismus (n = 4); ASW = Stereo-weak participant with otherwise normal binocular vision (n = 1); N = Stereo-normal participants (n = 10); \* = participants with amblyopia.

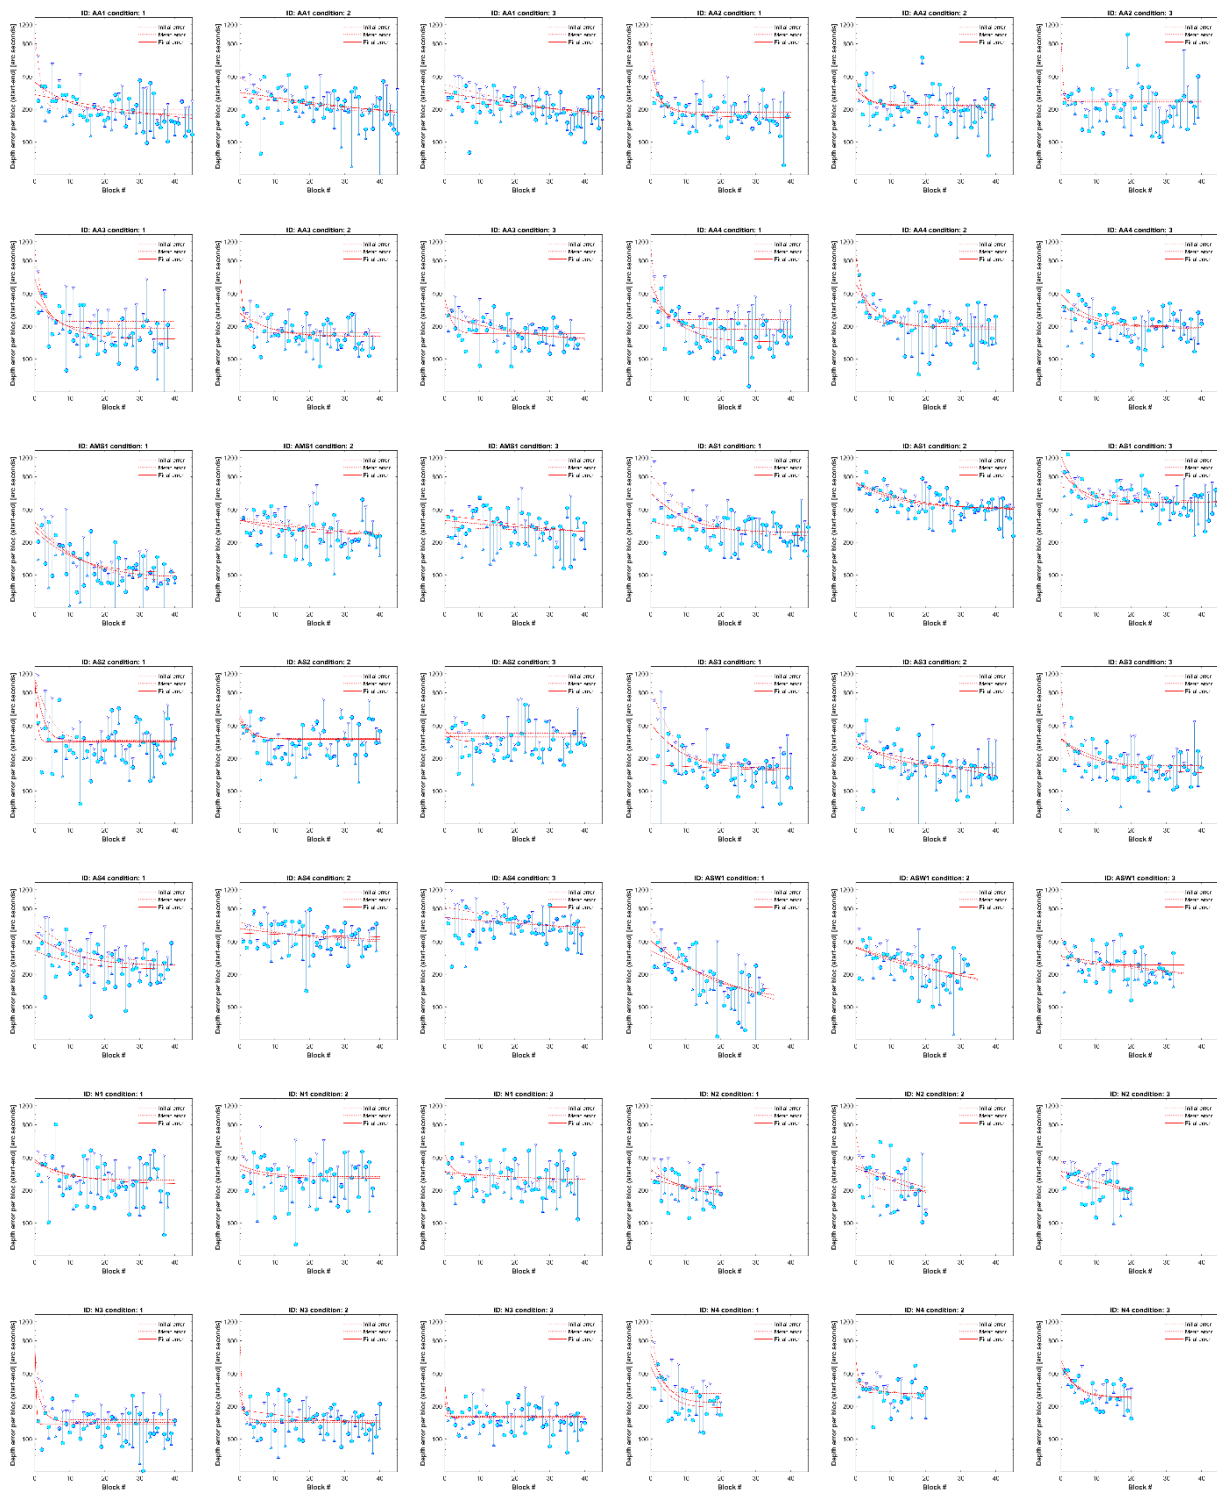

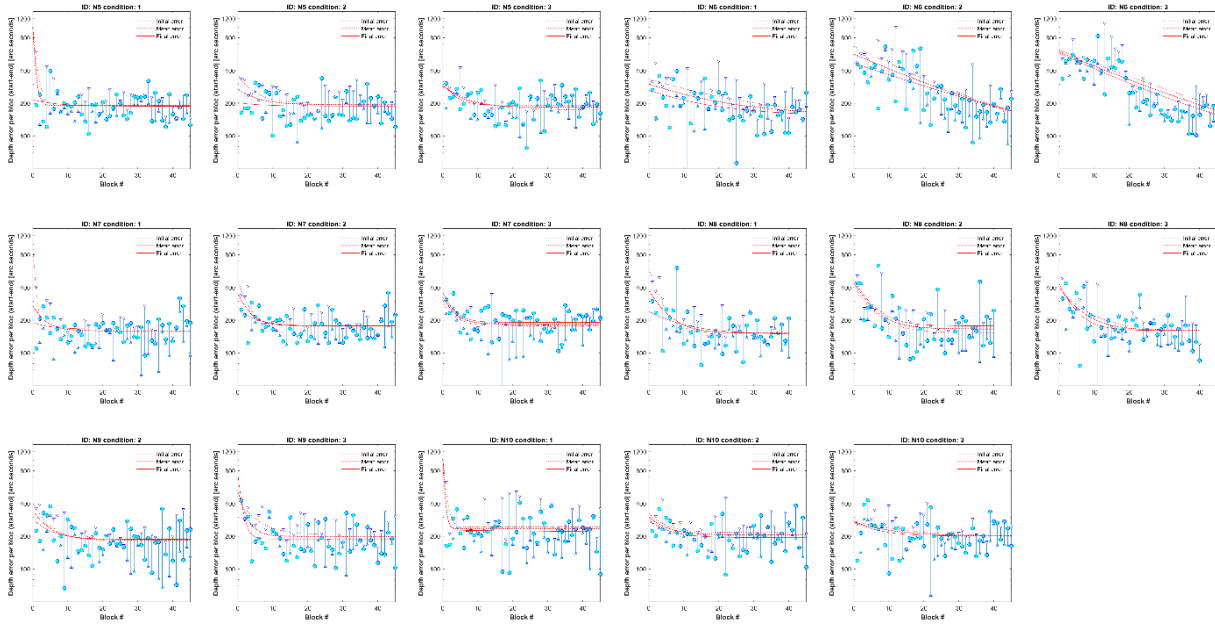

*Figure S1. Across-block learning for each participant and condition.* Each block is represented as a vertical line, with a triangle on one end indicating the depth error at the beginning of the block and a circle indicating the depth error at the end of the block. The fits represent an exponential function to the initial error at each block (dotted line), mean error (hashed line), and final error (continuous line).

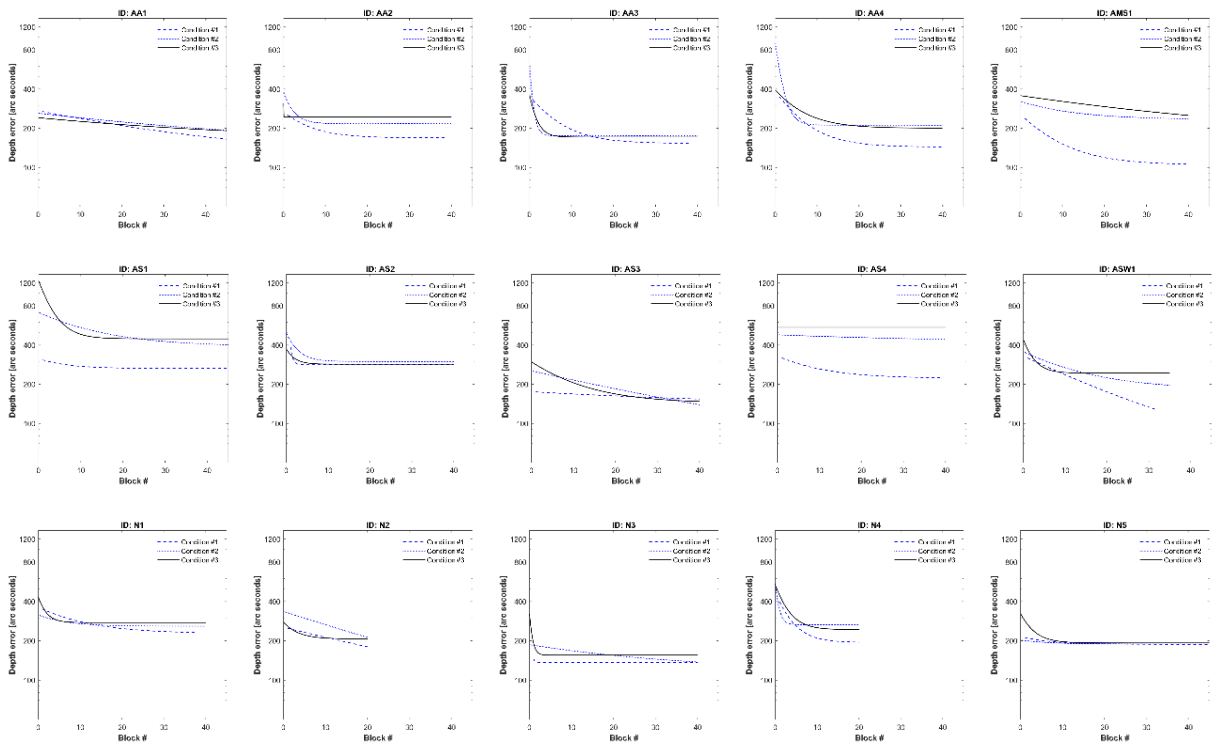

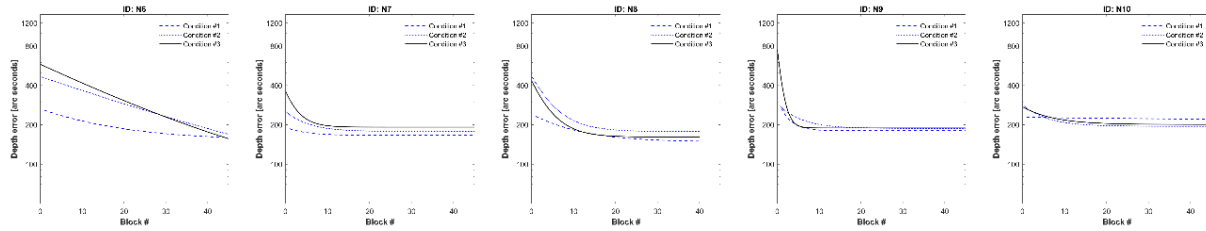

Figure S2. Across-block learning for all participants. Each graph shows the exponential fit of the end-block depth error in the three conditions: Condition 1, blue dashed line; Condition 2, blue dotted line; Condition 3, dark continuous line.

Table S2

*DartBoard in-game accuracy of a normal sighted participant in two scenarios: binocular vision (BV) and monocular vision (MV) by means of a physical patch. Time of game play 15 minutes in both cases. Condition (Level 1, 2 and 3); total number of trials; percentage of successful hits towards de board; median accuracy and interquartile range (seconds of arc); dichoptic task errors (per 100 trials)*

| Condition | Trials |    | Hits (per 100 trials) |      | Accuracy (arc secs) |                 | Dichoptic errors |    |
|-----------|--------|----|-----------------------|------|---------------------|-----------------|------------------|----|
|           | BV     | MV | BV                    | MV   | BV                  | MV              | BV               | MV |
| 1         | 23     | 14 | 100                   | 78.6 | 201 [106 – 333]     | 583 [308 – 753] | 0                | 14 |
| 2         | 22     | 19 | 100                   | 84.2 | 251 [157 – 396]     | 566 [402 – 915] | 0                | 26 |
| 3         | 24     | 19 | 100                   | 63.2 | 165 [56 – 331]      | 363 [230 – 860] | 42               | 53 |

Table S3

*Halloween in-game accuracy of a normal sighted participant in two scenarios: binocular vision (BV) and monocular vision by means of a physical patch (MV). Time of game play 15 minutes in both cases. Condition (level 1, 2 and 3); total number of trials; successful trials (per 100 trials); dichoptic task errors (per 100 trials)*

|       |    | Trials  |        |        | Successful trials (per 100 trials) |        |        | Dichoptic errors (per 100 trials) |        |        |
|-------|----|---------|--------|--------|------------------------------------|--------|--------|-----------------------------------|--------|--------|
|       |    | Cond 1  | Cond 2 | Cond 3 | Cond 1                             | Cond 2 | Cond 3 | Cond 1                            | Cond 2 | Cond 3 |
|       |    | Overall | BV     | 146    | 141                                | 133    | 92     | 89                                | 86     | 2      |
|       | MV | 133     | 136    | 118    | 77                                 | 61     | 65     | 10                                | 10     | 12     |
| 1000" | BV | 18      | 18     | 18     | 100                                | 100    | 100    | 0                                 | 0      | 0      |
|       | MV | 18      | 22     | 26     | 100                                | 82     | 69     | 0                                 | 0      | 0      |
| 650"  | BV | 18      | 20     | 19     | 100                                | 90     | 95     | 0                                 | 5      | 5      |
|       | MV | 19      | 114    | 44     | 95                                 | 57     | 70     | 5                                 | 12     | 18     |
| 420"  | BV | 19      | 18     | 22     | 95                                 | 100    | 77     | 5                                 | 0      | 14     |
|       | MV | 21      |        | 48     | 86                                 |        | 58     | 10                                |        | 13     |
| 270"  | BV | 24      | 27     | 25     | 100                                | 89     | 96     | 0                                 | 0      | 0      |

|      |    |    |    |    |    |    |    |    |   |   |
|------|----|----|----|----|----|----|----|----|---|---|
|      | MV | 33 |    |    | 73 |    |    | 9  |   |   |
| 180" | BV | 25 | 27 | 26 | 96 | 85 | 92 | 4  | 0 | 0 |
|      | MV | 42 |    |    | 60 |    |    | 17 |   |   |
| 120" | BV | 31 | 31 | 23 | 77 | 77 | 61 | 3  | 0 | 0 |
|      | MV |    |    |    |    |    |    |    |   |   |
| 80"  | BV | 11 |    |    | 82 |    |    | 0  |   |   |
|      | MV |    |    |    |    |    |    |    |   |   |

Table S4

*d'* PPR for each participant, cue scaffolding level, and stereoacuity demand.

| SID  | Condition 1 |      |      |      | Condition 2 |      |      |      | Condition 3 |      |      |      |
|------|-------------|------|------|------|-------------|------|------|------|-------------|------|------|------|
|      | 1000"       | 800" | 600" | 400" | 1000"       | 800" | 600" | 400" | 1000"       | 800" | 600" | 400" |
| AA1  | 1           | 1.28 | 1.07 | 0.93 | 0.84        | 1.1  | 1.29 | 1.29 | 1           | 1.01 | 1.11 | 0.93 |
| AA2  | 1.15        | 1.11 | 1.18 | 1.45 | 1.11        | 1.11 | 1.02 | 1.5  | 0.8         | 1.25 | 1.63 | 2.05 |
| AA3  | 0.99        | 1.10 | 1.17 | 1.29 | 1           | 1.06 | 1.18 | 0.91 | 0.99        | 1.12 | 1.24 | 1.22 |
| AA4  | 0.99        | 2.37 | 1.55 | 1.49 | 0.99        | 2.06 | 1.83 | 1.3  | 1           | 1.53 | 1.63 | 0.77 |
| AMS1 | 1           | 1.48 | 0.97 | 1.08 | 1           | 1.18 | 1.22 | 1.1  | 1           | 1.37 | 1.36 | 1.16 |
| AS1  | 1           | 1.71 | 1.42 | 1.77 | 1.59        | 1.4  | 1.5  | 1.7  | 1.6         | 1.3  | 2    | 0.76 |
| AS2  | 0.9         | 3.65 | 2.63 | 1.91 | 1           | 3.04 | 2.43 | 1.1  | 1.08        | 3.07 | 2.92 | 1.18 |
| AS3  | 1           | 1.04 | 1.03 | 1.34 | 0.76        | 0.9  | 0.96 | 1.19 | 0.76        | 0.88 | 0.89 | 1    |
| AS4  | 1           | 1.45 | 1.45 | -    | 2.28        | 1.79 | -    | -    | 1.35        | 1.53 | 0.38 | -    |
| ASW1 | 1.01        | 1.15 | 1.14 | 1.18 | 1.2         | 1.2  | 0.97 | 1.1  | 1.12        | 1.1  | 1.16 | 0.88 |
| N1   | 0.9         | 1.11 | 1.12 | 1.1  | 1.01        | 0.87 | 1.15 | 1.2  | 0.94        | 0.74 | 1.12 | 1.22 |
| N2   | 1.01        | 1.4  | 1.4  | 1.05 | 1           | 1.19 | 1.38 | 1.46 | 1.06        | 1.27 | 1.31 | 0.95 |
| N3   | -           | 1.03 | 0.98 | 1.09 | -           | 0.66 | 1.06 | 0.85 | -           | 0.76 | 0.91 | 1.17 |
| N4   | 1.12        | 1.4  | 1.36 | 1.35 | 1.25        | 1.45 | 1.28 | 2.2  | 1.07        | 1.2  | 1.5  | 0.54 |
| N5   | 1           | 0.98 | 1.24 | 1.13 | 1           | 0.92 | 1.2  | 0.97 | 1           | 1.05 | 1.23 | 1.02 |
| N6   | 1           | 1.05 | 1.04 | 0.88 | 1           | 1.02 | 1.22 | 1.37 | 1           | 1.17 | 1.27 | 1.31 |
| N7   | 0.9         | 0.85 | 1.17 | 1    | 0.74        | 0.75 | 0.87 | 1.08 | 0.63        | 0.7  | 0.84 | 0.82 |
| N8   | 1.06        | 1.33 | 1.43 | 0.83 | 1.22        | 1.14 | 1.13 | 1.27 | 1.22        | 0.95 | 1.26 | 1.64 |
| N9   | -           | 0.92 | 1.75 | 1.29 | -           | 0.99 | 1.01 | 1    | -           | 0.73 | 1.05 | 1.19 |
| N10  | 1           | 0.93 | 1.11 | 1.53 | 1.01        | 0.85 | 1.07 | 1.06 | 1.01        | 0.92 | 1.07 | 1.02 |

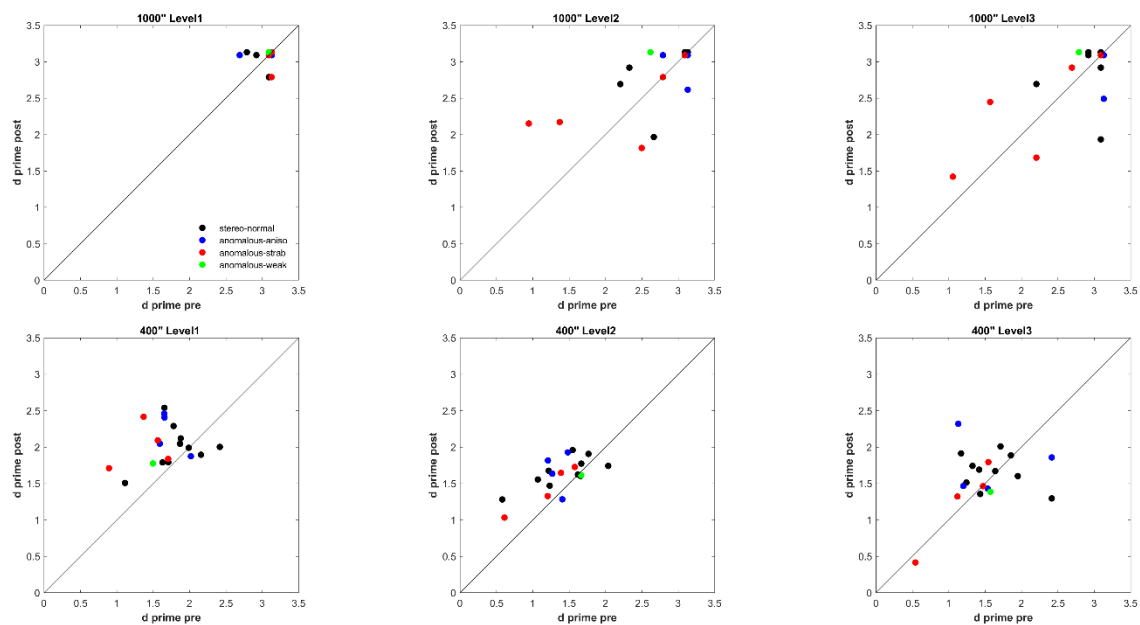

Figure S3. Halloween game pre post  $d'$  values for stereo demand of 1000'' and 400'' at each condition (level 1, 2 and 3). Symbols represent a different participant and group: anisometropia (blue), strabismus (red), stereo-weak (green), and normal binocular (grey). Points above the unity line indicate an improvement in accuracy in the first three hours compared to the last three hours of game play.
